# Supplementary material
Source: Springer Nature journal article supplement (http://www.springermedizin.de/resource/supplementary/13049_2009_62_MOESM2_ESM.pdf/9665800)
Supplement: MOESM2 [file 9665800]

Nonspecific  
Immune system

Cell mediated - Neutrophils  
Monocytes (macrophages)  
NK-cells

Humoral - Cytokines  
Complement

Specific  
Immune system

Cell mediated - T lymphocytes  
B lymphocytes

Humoral - Antibodies
